# Supplementary material
Source: publisher figshare collection journal article supplement (https://springernature.figshare.com/ndownloader/files/37731483)
Supplement: Supplementary file 1 [file 37731483]

## Sheet: pXRF results by feature
SAMPLE	LOCATION	Ba	Sn	Bi	As	Au	Pb	W	Cu	Ni	Co	Fe	Mn	Ca	P	Si	Cl	S	Mg
Ivy tendril swirl
Noa 15	bottom right ivy tendril swirl	<LOD	<LOD	<LOD	881.4	<LOD	7161.54	189.99	<LOD	<LOD	<LOD	10422.4	<LOD	15855.9	952.29	215786	10063.6	43168	<LOD
Griffin
PXRF12	grey/black right bottom griffin in grooves	303.5	112.46	<LOD	2189.38	<LOD	23918.9	<LOD	119.59	<LOD	<LOD	4601.24	187.02	81744.2	1257.27	107692	10153	30416.3	<LOD
PXRF11	black - right bottom griffin eye	566.53	6230.23	<LOD	8782.02	<LOD	76671.1	<LOD	948.14	<LOD	<LOD	2505.39	599.77	52969.2	925.49	39633.8	16949	61807.9	<LOD
Noa 13	left petal of flower in left griffin	259.72	<LOD	<LOD	86.31	<LOD	2798.93	<LOD	<LOD	<LOD	<LOD	17583.5	<LOD	13396.5	962.51	319553	4961.99	13718.7	10493.5
Noa 14	centre of flower in left griffin	194.3	<LOD	<LOD	<LOD	<LOD	1540.07	<LOD	<LOD	<LOD	<LOD	5392.89	<LOD	6018.43	616.91	321632	4784.31	10185.2	<LOD
Beside griffin
PXRF13	mid-brown - spot to right bottom griffin	392.13	155.84	<LOD	5450.33	<LOD	43354.8	<LOD	<LOD	<LOD	<LOD	5217.44	515.67	10186.9	1464.26	99276.6	15001.3	52637	<LOD
17.2	right of bottom right griffin	397.07	< LOD	< LOD	97.99	< LOD	2414.12	< LOD	33.63	< LOD	< LOD	3879.71	198.09	13655.1	< LOD	286323	3722.05	31772.5
17.3	right of top right griffin	296.7	47.57	< LOD	52.96	< LOD	1747.63	< LOD	< LOD	< LOD	< LOD	4728.98	196.02	13327.6	< LOD	263306	3804.99	26355.6
Grey/black exterior frame
PXRF1	grey/black next to exterior frame	<LOD	<LOD	<LOD	114.76	<LOD	1478.95	<LOD	<LOD	<LOD	<LOD	4969.36	<LOD	6394.41	578.36	250180	3183.22	8197.21	<LOD
PXRF6	black/grey on right of frame	435.1	100.29	<LOD	2798.92	<LOD	26613.1	382.2	208.91	<LOD	<LOD	4001.64	<LOD	30133.7	682.05	149750	4921.2	17251.6	<LOD
17.5	left edge of frame - black/grey	893.6	223.37	< LOD	4105.15	< LOD	29198.3	543.69	459.08	< LOD	< LOD	3227.29	137.21	6253.84	< LOD	126747	5239.24	37970.5
17.14	top above dark border	1547.97	314.11	< LOD	5642.43	872.01	48777.9	< LOD	356.02	97.65	< LOD	15119	311.11	11394.8	13406	114559	10499.7	30716.3
Gilded frame
PXRF2	gold on brown in frame	1530.67	928.22	439.96	17594.4	4530.18	145735	5441.76	778.62	518.58	1313.55	25313.7	513.83	9709.78	18562.5	64043.5	16835.5	55834.3	22336.8
PXRF5	bottom inner frame mid brown	353.71	74.5	<LOD	1990.9	<LOD	23995	<LOD	90.52	<LOD	<LOD	11483.2	<LOD	12014	573.96	287509	3030.86	18399.3	<LOD
17.7	Top of frame above P of IMP	2389.23	548.11	< LOD	10083.2	3924.81	41492.8	2278.33	113.98	111.38	< LOD	14910.4	301.16	8377.22	17710.6	93910.2	7139.05	32620.4
17.6	left inside frame with mid brown	606.49	738.39	< LOD	11516.9	502.16	48579.1	1127.67	135.19	174.28	< LOD	15321.3	405.88	9396.69	4115.53	68289.9	9040.59	21381.1
Black informal border interior of frame
PXRF7	black in interior frame - informal border	408.64	109.13	<LOD	3113.84	<LOD	25006.8	<LOD	446.62	<LOD	<LOD	5563.8	270.55	10808.4	965.32	228652	6485.82	29440.1	<LOD
Inscription panel background
PXRF4	panel background above E of CAESARI	502.72	154.07	213.36	6891.78	<LOD	35119.1	<LOD	2455.22	734.97	3995.86	5337.44	<LOD	11259.7	1112.55	200719	6535.36	30163.8	<LOD
17.10	flaking light brownish/grey above M of IMP	354.43	< LOD	< LOD	102.61	< LOD	3129.91	< LOD	72.72	< LOD	< LOD	1286.71	151.34	4740.94	< LOD	316177	4655.71	17151.8
17.11	greyish-brown background to inscription panel	3341.2	1973.27	1181.52	29500.7	< LOD	80738.9	679.59	7355.35	2462.32	10603.6	10315.6	532.99	10094.8	< LOD	86006.6	10191.2	25272
17.12	greyish-brown spot next to S in CAESARI	1111.15	3899.35	796.1	34133.6	< LOD	73013.4	792.11	13620.8	1635.14	5152.87	6224.28	558.17	14424.8	< LOD	49103.5	14910.5	30722.6
17.13	greyish-brown under cross bar of H in HADRIANO	2289.02	517.98	192.02	13487.9	< LOD	45653.2	561.28	2306.57	1039.7	4854.5	6454.32	376.89	9627.79	< LOD	138542	8458.9	22788.2
Letters
PXRF3	gold at top middle N of ANTONINO	600.04	346.41	570.7	14871	1692.28	72885.7	2428.07	2097.91	866.86	3118.26	38104.2	406.79	15682.2	13873.1	95325.3	12445.5	35899.1	14471.1
PXRF8	gold at top middle N of ANTONINO	1017.49	584.61	1167.44	20057.3	1099.01	82119.9	949.92	3758.75	1371.04	4109.39	37199.3	423.19	11636.6	16200.2	65478.8	14155.2	50276.3	<LOD
17.8	second N in ANTONINUS gold at top	2281.67	611.53	411.55	20795	3967.66	60104.2	2215.13	2593.72	799.2	2375.08	28331	416.96	13483.6	22017	87589	10427.8	34226.1
17.9	second A in CAESAR mid-brown	461.09	447.78	145.43	13198.9	< LOD	45115.3	564.64	1001.46	615.39	2050.74	16548.2	331.51	13636.7	1911.67	70274.4	8944.54	24429.5
Artilliery' holes
PXRF9	bottom artillery ball (double circle)	241.66	<LOD	<LOD	62.68	<LOD	495.87	<LOD	<LOD	<LOD	<LOD	8306.42	<LOD	4368.16	692.55	317009	1958.97	3401.15	8192.5
PXRF10	middle artillery ball circle in AVG	<LOD	<LOD	<LOD	<LOD	<LOD	594.39	<LOD	<LOD	<LOD	<LOD	7704.59	<LOD	5972.44	<LOD	320499	1504.39	4595.93	<LOD
Noa 11	middle artillery ball circle in AVG	<LOD	<LOD	<LOD	<LOD	<LOD	572.59	<LOD	<LOD	<LOD	<LOD	6591.88	<LOD	6651.65	<LOD	189811	1805.46	5774.23	<LOD
Background sandstone
PXRFback1	background - left side below centre pelta	298	<LOD	<LOD	<LOD	<LOD	52.27	<LOD	<LOD	<LOD	<LOD	2317.12	<LOD	34003.5	<LOD	287459	1169.85	38312.4	<LOD
PXRFback2	background - left side middle bottom griffin	244.17	<LOD	<LOD	<LOD	<LOD	57.79	<LOD	<LOD	<LOD	<LOD	6007.98	<LOD	38918.3	314.55	236424	4456.23	31784.8	<LOD
PXRFback3	background - right side back at exposed crack	274.01	<LOD	<LOD	<LOD	<LOD	38.55	<LOD	<LOD	<LOD	<LOD	1762.51	<LOD	90088.2	<LOD	51411.7	531.05	51832.6	<LOD
PXRFback4	background - right side bottom next to circular feature	338.04	<LOD	<LOD	255.8	<LOD	1753.4	<LOD	<LOD	<LOD	<LOD	4780	<LOD	53305.1	422.78	219226	2630.41	66329.5	<LOD
PXRFback5	background - left exposed cracked surface at edge bottom griffin	181.44	<LOD	<LOD	143.91	<LOD	1858.02	<LOD	<LOD	<LOD	<LOD	7989.04	<LOD	21917.8	1062.13	339596	3752.03	28504.5	<LOD
17.1	background right side edge - bottom close to griffin head	499.44	< LOD	< LOD	11.19	< LOD	54.86	< LOD	< LOD	< LOD	< LOD	2373.2	149.31	44244	< LOD	214610	1149.82	101403
MEAN		305.85			136.967		635.815					4204.97		47079.5	599.82	224788	2281.57	53027.8
STD DEV		108.509			122.453		906.824					2481.36		23525.5	404.013	97404.1	1587.08	27523.6
